# Supplementary material for: Viral Glycoproteins Induce NLRP3 Inflammasome Activation and Pyroptosis in Macrophages
Source: MDPI journal article supplement (doi:10.3390/v13102076), 2021-10-15
Supplement: s1 [file s1]

## Supplementary Materials:

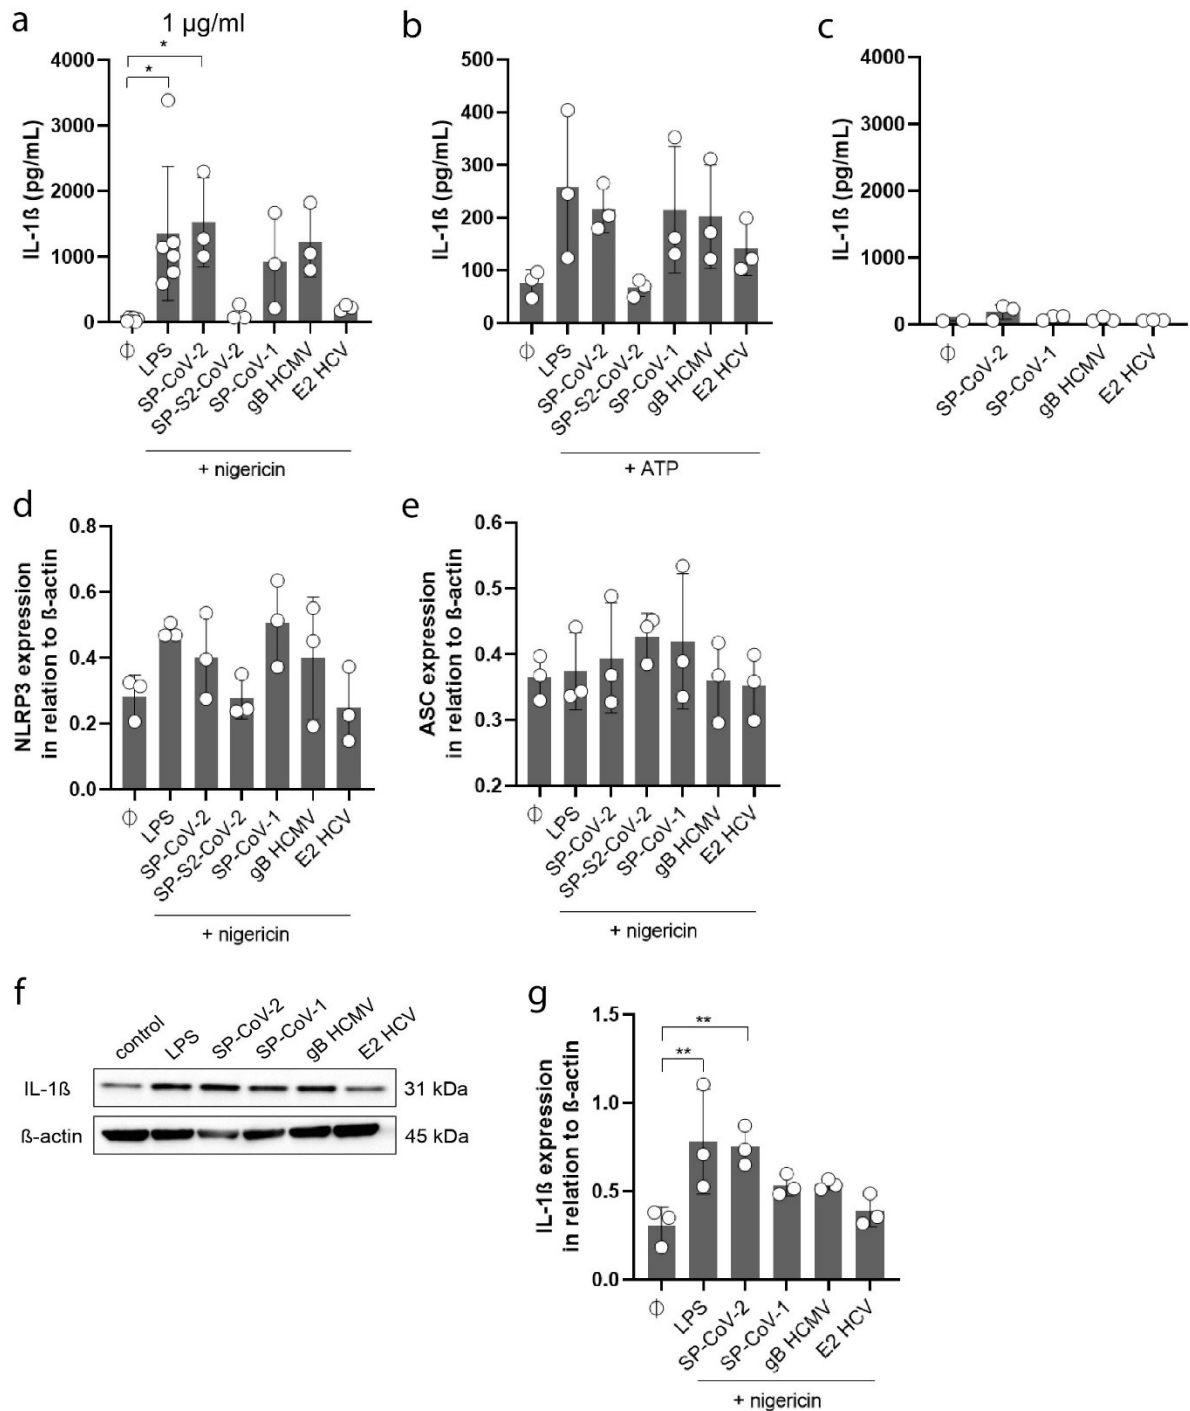

**Figure S1.** (a) Quantification of IL-1 $\beta$  concentration (pg/ml) in the supernatant of THP-1 macrophages stimulated with LPS (5  $\mu$ g/ml; n= 6) or viral antigens (as indicated, 1  $\mu$ g/ml; n= 3). All cells were stimulated with nigericin (5  $\mu$ M). Statistical analysis was done using one-way ANOVA with Tukey's multiple comparisons test. (\* = p $\leq$  0.05). (b) THP-1 macrophages were stimulated with LPS (5  $\mu$ g/ml) or viral glycoproteins (as indicated, 10  $\mu$ g/ml) and subsequently exposed to ATP (5 mM) (n= 3). IL-1 $\beta$  concentration (pg/ml) was quantified in supernatant via IL-1 $\beta$  ELISA. (c) THP-1 macrophages were stimulated with viral glycoproteins (as indicated, 10  $\mu$ g/ml). IL-1 $\beta$  concentration (pg/ml) was quantified in supernatant via IL-1 $\beta$  ELISA. (d) Quantification of NLRP3 western blot shown in Figure 1e. NLRP3 expression was quantified in relation to  $\beta$ -actin expression. (e) Quantification of ASC western blot shown in Figure 1e. ASC expression was quantified in relation to  $\beta$ -actin expression. (f) Detection of IL-1 $\beta$  (1:1000 for IL-1 $\beta$  antibody) in total cell lysates of THP-1 macrophages stimulated with LPS (5  $\mu$ g/ml)

or viral antigens (as indicated, 10  $\mu\text{g/ml}$ ). All cells were stimulated with nigericin (5  $\mu\text{M}$ ).  $\beta$ -actin (1:1000 dilution) was used as a loading control. **(g)** Quantified results of Western Blot in Supplementary Fig. 1f are expressed as mean  $\pm$  SD. Statistical analysis was done using one-way ANOVA with Dunnett's multiple comparisons test. Results were compared to a control ( $\emptyset$ ) (\*\*,  $p \leq 0.01$ ).

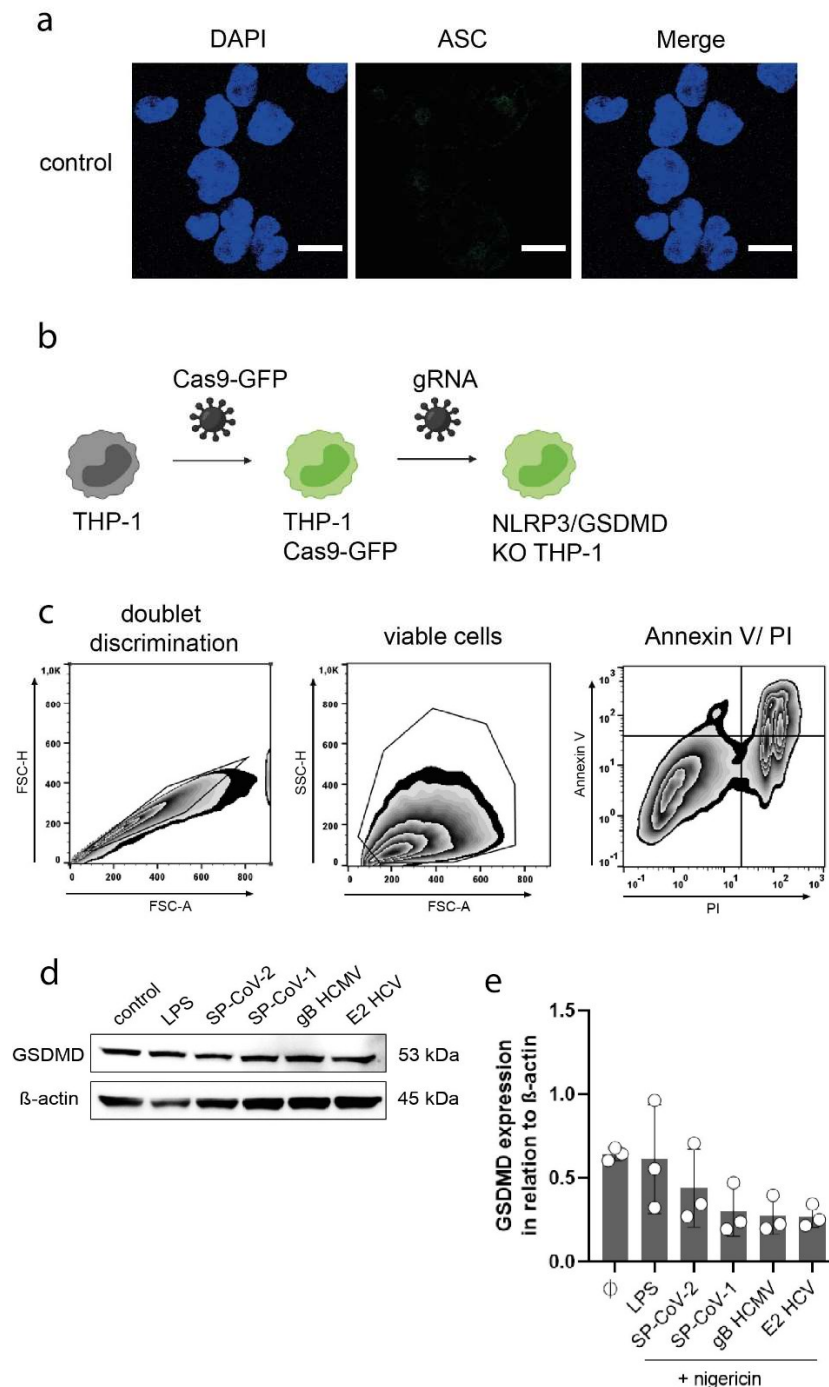

**Figure S2.** **(a)** Fluorescence microscopy of unstimulated THP-1 macrophages (control). Cells were stained with ASC Antibody (B-3) Alexa Fluor 488 (1:100 dilution) and with DAPI. Representative images are shown (Scale bar: 15  $\mu\text{m}$ ). **(b)** Scheme of the generation of knockout (KO) cell lines. THP-1 macrophages were first transduced with Cas9-GFP. Cells were then transduced with guide RNAs (gRNA). **(c)** Representative gating strategy showing flow cytometry analysis for THP-1 cell death staining with Annexin V and PI. **(d)** Detection of GSDMD (1:500 for GSDMD antibody) in total cell lysates of THP-1 macrophages stimulated with LPS (5  $\mu\text{g/ml}$ ) or viral antigens (as indicated, 10  $\mu\text{g/ml}$ ). All cells were stimulated with nigericin (5  $\mu\text{M}$ ).  $\beta$ -actin (1:1000 dilution) was used as a loading control. **(e)** Quantified results of Western Blot in Supplementary Fig. 2d are expressed as mean  $\pm$  SD.
